# Supplementary material for: Risk factors for severe COVID-19 among patients with systemic lupus erythematosus: a real-world analysis of a large representative US administrative claims database, 2020–2021
Source: PubMed Central journal article supplement — RMD Open. 2023 Aug 17;9(3):e003250. doi: 10.1136/rmdopen-2023-003250 (PMC10441046; doi:10.1136/rmdopen-2023-003250), 2023-08-17
Supplement: rmdopen-2023-003250supp002.pdf [file rmdopen-2023-003250supp002.pdf]

Supplemental Table 1. Presence of all Elixhauser Comorbidity Index diagnoses among all study patients, and those with and without severe COVID

|                                                  | All SLE Patients<br>with COVID<br>N=2,890 | Severe<br>COVID<br>N=500 | No severe<br>COVID<br>N=2,390 | p-value |
|--------------------------------------------------|-------------------------------------------|--------------------------|-------------------------------|---------|
| <b>Baseline comorbidities,<sup>1</sup> N (%)</b> |                                           |                          |                               |         |
| AIDS/HIV                                         | 5 (0.2%)                                  | 3 (0.6%)                 | 2 (0.1%)                      | 0.039   |
| Alcohol abuse                                    | 38 (1.3%)                                 | 13 (2.6%)                | 25 (1.0%)                     | 0.006   |
| Blood loss anemia                                | 102 (3.5%)                                | 25 (5.0%)                | 77 (3.2%)                     | 0.050   |
| Chronic pulmonary disease                        | 436 (15.1%)                               | 95 (19.0%)               | 341 (14.3%)                   | 0.007   |
| Coagulopathy                                     | 248 (8.6%)                                | 75 (15.0%)               | 173 (7.2%)                    | <0.001  |
| Congestive heart failure                         | 187 (6.5%)                                | 86 (17.2%)               | 101 (4.2%)                    | <0.001  |
| Deficiency anemia                                | 723 (25.0%)                               | 206 (41.2%)              | 517 (21.6%)                   | <0.001  |
| Depression                                       | 738 (25.5%)                               | 153 (30.6%)              | 585 (24.5%)                   | 0.004   |
| Diabetes, complicated                            | 297 (10.3%)                               | 108 (21.6%)              | 189 (7.9%)                    | <0.001  |
| Diabetes, uncomplicated                          | 163 (5.6%)                                | 46 (9.2%)                | 117 (4.9%)                    | <0.001  |
| Drug abuse                                       | 155 (5.4%)                                | 43 (8.6%)                | 112 (4.7%)                    | <0.001  |
| Fluid and electrolyte disorders                  | 480 (16.6%)                               | 163 (32.6%)              | 317 (13.3%)                   | <0.001  |
| Hypertension, complicated                        | 400 (13.8%)                               | 154 (30.8%)              | 246 (10.3%)                   | <0.001  |
| Hypertension, uncomplicated                      | 1,039 (36.0%)                             | 198 (39.6%)              | 841 (35.2%)                   | 0.062   |
| Hypothyroidism                                   | 480 (16.6%)                               | 78 (15.6%)               | 402 (16.8%)                   | 0.505   |
| Liver disease                                    | 162 (5.6%)                                | 32 (6.4%)                | 130 (5.4%)                    | 0.396   |
| Lymphoma                                         | 34 (1.2%)                                 | 11 (2.2%)                | 23 (1.0%)                     | 0.020   |
| Metastatic cancer                                | 13 (0.4%)                                 | 03 (0.6%)                | 10 (0.4%)                     | 0.481   |
| Non-paralysis neurological disorders             | 382 (13.2%)                               | 102 (20.4%)              | 280 (11.7%)                   | <0.001  |
| Obesity                                          | 955 (33.0%)                               | 200 (40.0%)              | 755 (31.6%)                   | <0.001  |
| Paralysis                                        | 54 (1.9%)                                 | 15 (3.0%)                | 39 (1.6%)                     | 0.040   |
| Peptic ulcer disease, excluding bleeding         | 43 (1.5%)                                 | 18 (3.6%)                | 25 (1.0%)                     | <0.001  |
| Peripheral vascular disorders                    | 185 (6.4%)                                | 60 (12.0%)               | 125 (5.2%)                    | <0.001  |
| Psychoses                                        | 240 (8.3%)                                | 66 (13.2%)               | 174 (7.3%)                    | <0.001  |
| Pulmonary circulation disorders                  | 99 (3.4%)                                 | 34 (6.8%)                | 65 (2.7%)                     | <0.001  |
| Renal failure                                    | 357 (12.4%)                               | 148 (29.6%)              | 209 (8.7%)                    | <0.001  |
| RA/collagen vascular diseases                    | 2,602 (90.0%)                             | 445 (89.0%)              | 2,157 (90.3%)                 | 0.396   |
| Solid tumor without metastasis                   | 85 (2.9%)                                 | 14 (2.8%)                | 71 (3.0%)                     | 0.837   |
| Valvular disease                                 | 297 (10.3%)                               | 86 (17.2%)               | 211 (8.8%)                    | <0.001  |
| Weight loss                                      | 126 (4.4%)                                | 36 (7.2%)                | 90 (3.8%)                     | 0.001   |

<sup>1</sup>Assessed during the 12-month baseline period before the index date (4/1/2020); AIDS: acquired immunodeficiency syndrome; COVID: coronavirus disease; HIV: human immunodeficiency virus; RA: rheumatoid arthritis; SLE: systemic lupus erythematosus
