# Supplementary figures and images for: Risk factors for severe COVID-19 among patients with systemic lupus erythematosus: a real-world analysis of a large representative US administrative claims database, 2020–2021
Source: PubMed Central journal article supplement — RMD Open. 2023 Aug 17;9(3):e003250. doi: 10.1136/rmdopen-2023-003250 (PMC10441046; doi:10.1136/rmdopen-2023-003250), 2023-08-17

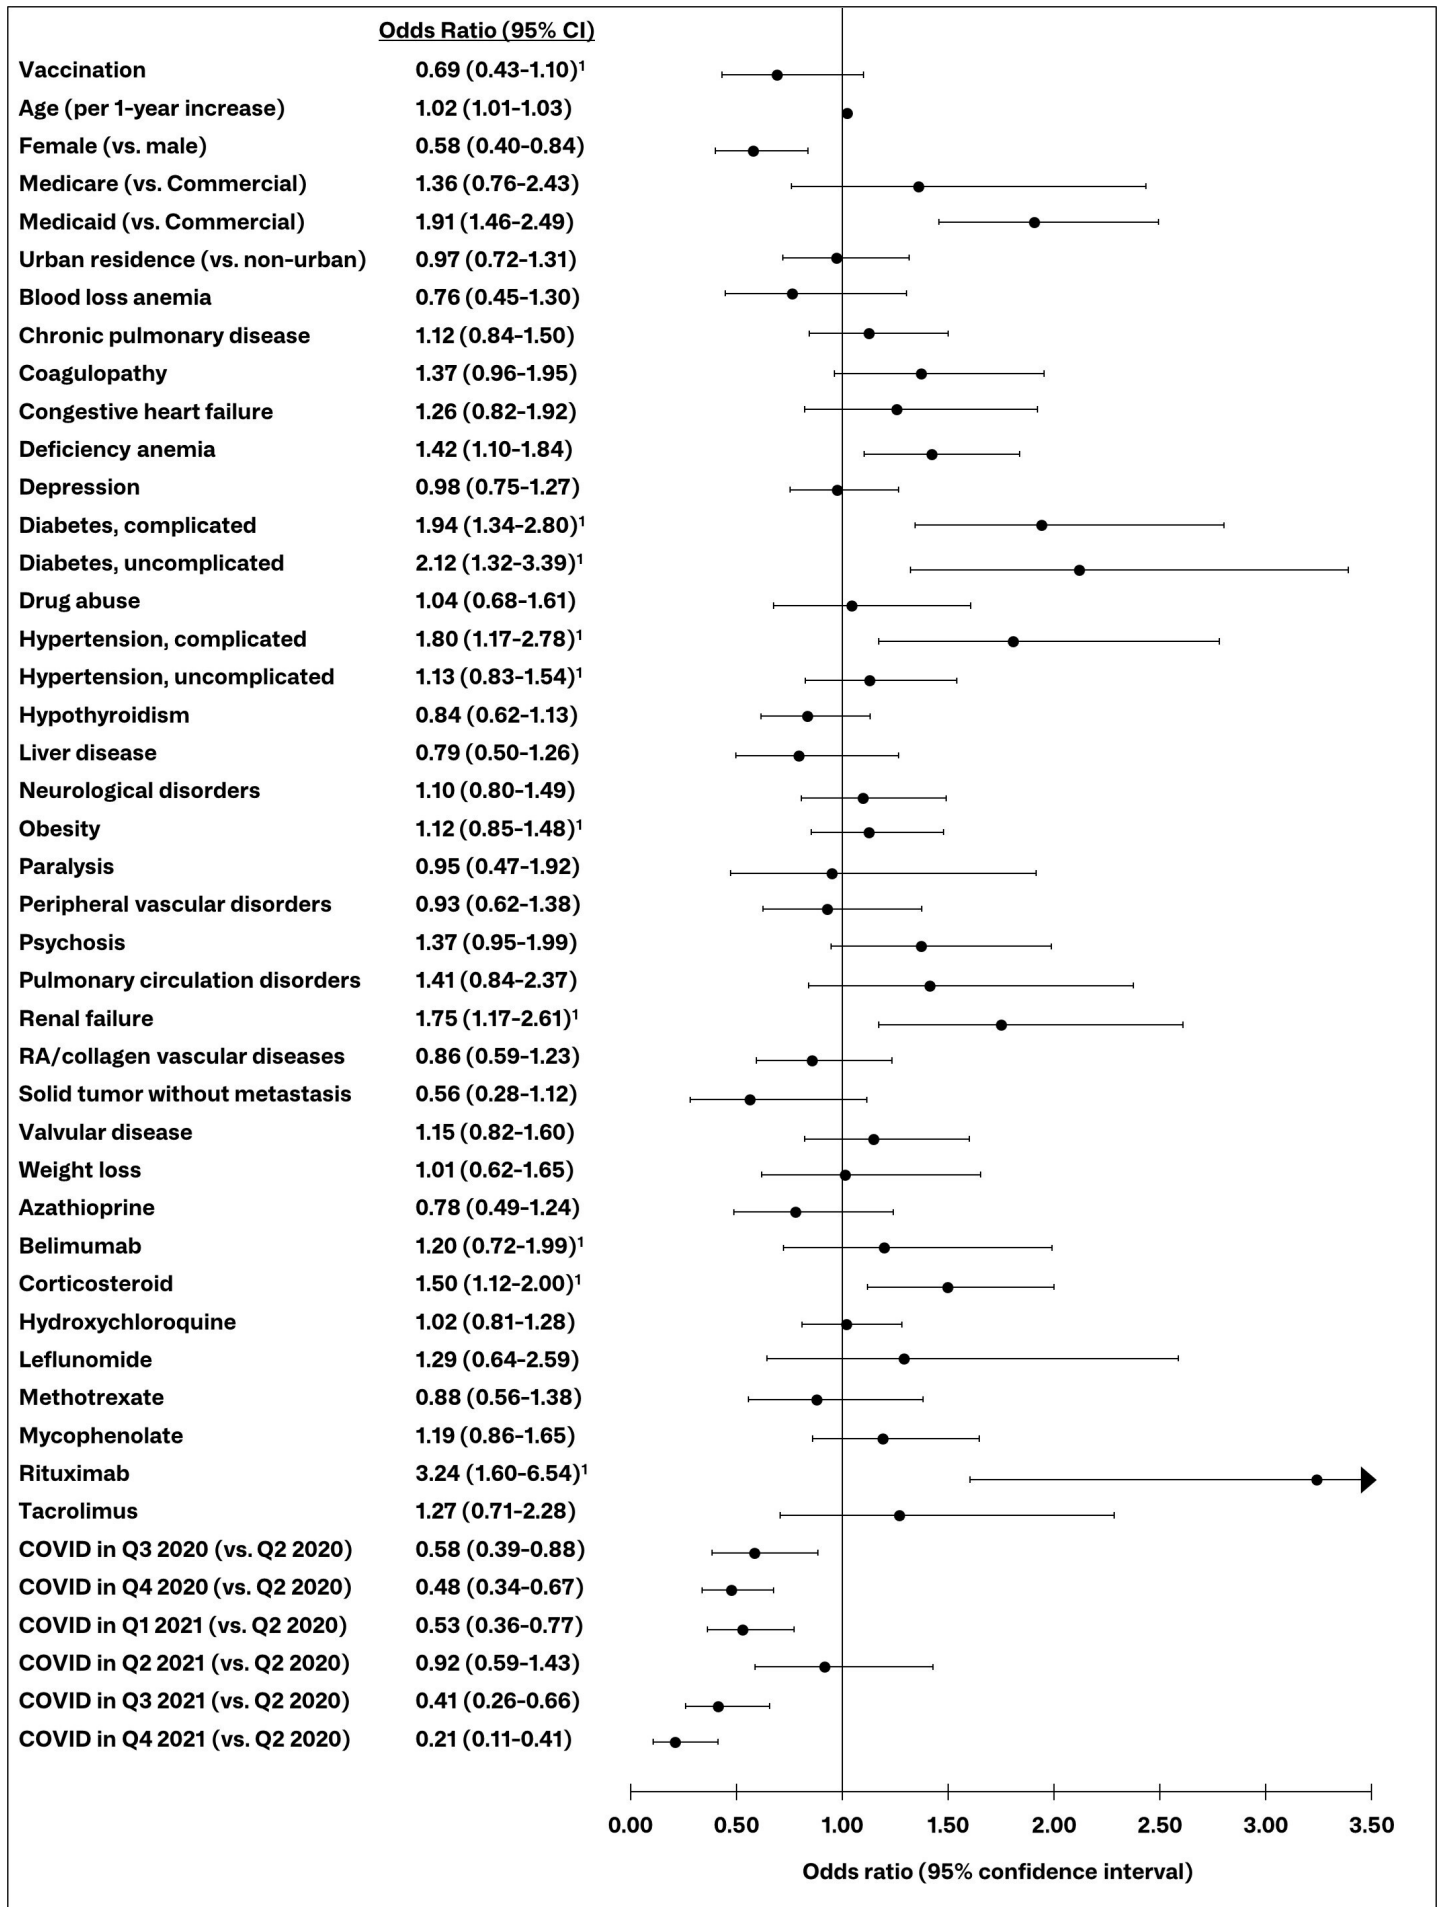

Supplement: rmdopen-2023-003250supp001.pdf [file rmdopen-2023-003250supp001.pdf]
